# Supplementary material for: Key Factors Determining the Behavior of Pathogens in Dry-Cured Ham after High Pressure Processing
Source: MDPI journal article supplement (doi:10.3390/app122412732), 2022-12-12
Supplement: s1 [file s1]

**Table S1.** Cardinal parameters of *Salmonella* and *Listeria monocytogenes* used to estimate the growth/no growth boundary through the gamma concept in the present study.

| Cardinal parameters |                      |                                |                                      |
|---------------------|----------------------|--------------------------------|--------------------------------------|
|                     |                      | <i>Salmonella</i> <sup>a</sup> | <i>L. monocytogenes</i> <sup>a</sup> |
| Temperature         | $T_{min}$            | 5.06 °C                        | -1.11 °C                             |
|                     | $T_{opt}$            | 39.30 °C                       | 38.00 °C                             |
|                     | $T_{max}$            | 46.48 °C                       | 42.90 °C                             |
| pH                  | $pH_{min}$           | 3.58                           | 4.28                                 |
|                     | $pH_{opt}$           | 7.00                           | 7.06                                 |
|                     | $pH_{max}$           | $2 \cdot pH_{opt} - pH_{min}$  | $2 \cdot pH_{opt} - pH_{min}$        |
| $a_w$               | $a_{w_{min}}$        | 0.951                          | 0.923                                |
|                     | $a_{w_{opt}}$        | 0.997                          | 0.996                                |
|                     | $a_{w_{max}}$        | 1.00                           | 0.997                                |
| Lactic acid         | $MIC_{lactic\ acid}$ | 6.13 mM                        | 4.97 mM                              |
|                     | $\alpha^b$           | 2                              | 1                                    |

<sup>a</sup> Values of growth parameters for both pathogens obtained from Sym'Previus (<https://symprevius.eu/fr/>)

<sup>b</sup>  $\alpha$  values obtained from Couvert et al. [28].
