# Supplementary material for: Key Factors Determining the Behavior of Pathogens in Dry-Cured Ham after High Pressure Processing
Source: MDPI journal article supplement (doi:10.3390/app122412732), 2022-12-12
Supplement: s1 [file s1]

**Table S2.** Gamma factors ( $\gamma$ ), interaction term between factors ( $\xi$ ) and the overall gamma factors ( $\Gamma$ ) calculated for *Salmonella* and *L. monocytogenes* according to the extrinsic and intrinsic characteristics of dry-cured hams (DCH) used in this study.

| Microorganism           | DCH extrinsic and intrinsic characteristics |     |                   |       |                  | $\gamma$ |             |       |       | $\xi$    | $\Gamma$ |          |
|-------------------------|---------------------------------------------|-----|-------------------|-------|------------------|----------|-------------|-------|-------|----------|----------|----------|
|                         | Temperature (°C)                            | pH  | Lactic acid (ppm) | $a_w$ | Temperature (°C) | pH       | lactic acid | $a_w$ |       |          |          |          |
| <i>Salmonella</i>       | 7                                           | 5.7 | 5000              | 0.870 | 0.005            | 0.856    | 0.759       | 0.000 | 0.000 | 0.00E+00 |          |          |
|                         |                                             |     |                   | 0.890 |                  |          |             | 0.000 |       |          | 0.00E+00 |          |
|                         |                                             |     |                   | 0.911 |                  |          |             | 0.000 |       |          | 0.00E+00 |          |
|                         |                                             |     |                   | 0.915 |                  |          |             | 0.000 |       |          | 0.00E+00 |          |
|                         |                                             |     |                   | 0.919 |                  |          |             | 0.000 |       |          | 0.00E+00 |          |
|                         |                                             |     |                   | 0.920 |                  |          |             | 0.000 |       |          | 0.00E+00 |          |
|                         |                                             |     |                   | 0.940 |                  |          |             | 0.000 |       |          | 0.00E+00 |          |
|                         |                                             |     |                   | 0.950 |                  |          |             | 0.000 |       |          | 0.00E+00 |          |
|                         |                                             |     |                   | 0.960 |                  |          |             | 0.208 |       |          | 0.00E+00 |          |
|                         |                                             |     |                   | 0.980 |                  |          |             | 0.667 |       |          | 0.102    | 2.16E-04 |
| <i>L. monocytogenes</i> | 7                                           | 5.7 | 5000              | 0.870 | 0.055            | 0.761    | 0.841       | 0.000 | 0.000 | 0.00E+00 |          |          |
|                         |                                             |     |                   | 0.890 |                  |          |             | 0.000 |       |          | 0.00E+00 |          |
|                         |                                             |     |                   | 0.911 |                  |          |             | 0.000 |       |          | 0.00E+00 |          |
|                         |                                             |     |                   | 0.915 |                  |          |             | 0.000 |       |          | 0.00E+00 |          |
|                         |                                             |     |                   | 0.919 |                  |          |             | 0.000 |       |          | 0.00E+00 |          |
|                         |                                             |     |                   | 0.920 |                  |          |             | 0.000 |       |          | 0.00E+00 |          |
|                         |                                             |     |                   | 0.940 |                  |          |             | 0.236 |       |          | 0.000    | 0.00E+00 |
|                         |                                             |     |                   | 0.950 |                  |          |             | 0.375 |       |          | 0.239    | 3.14E-03 |
|                         |                                             |     |                   | 0.960 |                  |          |             | 0.514 |       |          | 0.742    | 1.34E-02 |
|                         |                                             |     |                   | 0.980 |                  |          |             | 0.791 |       |          | 1.000    | 2.78E-02 |
